# Supplementary material for: Preparation of CuO nanosheet array thin film with controlled morphology for SERS and photocatalysis
Source: Royal Society of Chemistry journal article supplement (doi:10.1039/d2nj06073f), 2023-01-01
Supplement: d2nj06073f1.pdf [file d2nj06073f1.pdf]

## **Preparation of CuO nanosheet array thin film with controlled morphology for SERS and photocatalysis**

Haoran Wu, Qiong Yang, Jingjing Wang\*, Huayu Zhou, Shaoxiong Qin,  
Jiaqi Pan, Chaorong Li \*

Key Laboratory of Optical Field Manipulation of Zhejiang Province,  
Department of Physics, Zhejiang Sci-Tech University, Hangzhou 310018,  
People's Republic of China

Corresponding author.

Email: [jjwang@zstu.edu.cn](mailto:jjwang@zstu.edu.cn) (J. Wang), [crli@zstu.edu.cn](mailto:crli@zstu.edu.cn) (C. Li)

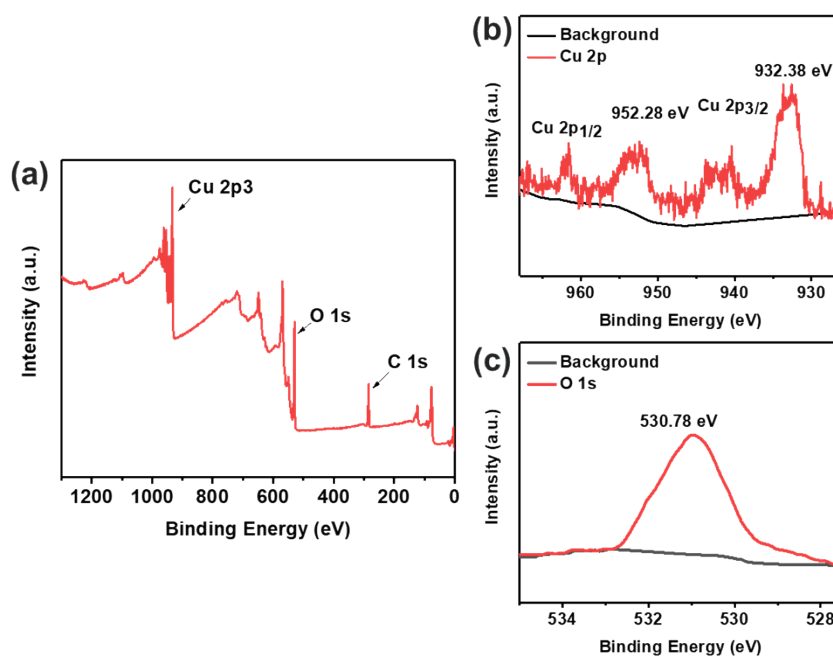

Fig. S1 (a) XPS spectrum of 0.5-10CuO substrate. (b) High resolution XPS spectrum of Cu 2P. (c) High resolution XPS spectrum of O 1S.

The elemental composition and chemical states of CuO substrate were characterized by X-ray photoelectron (XPS) spectroscopy. 0.5-10CuO substrate was selected as a typical substrate, and the full XPS spectrum was shown in Fig. S1(a). The analysis showed the existence of Cu 2P and O1s orbitals. Further, the high-resolution Cu 2P XPS spectrum is shown in Fig. S1(b). There are two satellite peaks at 932.38 eV and 952.28 eV, corresponding to the Cu 2p<sub>3/2</sub> and Cu 2p<sub>1/2</sub> orbits, respectively. The difference between these two energy levels is about 20 eV, which verifies the phase of CuO.<sup>1</sup> Then, Fig. S1(c) shows the 1S orbital of O with a bond energy of about 530.78 eV. This, together with the previous XRD patterns, confirmed that the material obtained by electrochemical anodic oxidation was undoubtedly copper oxide.

1 A. Balcytis, M. Ryu, G. Seniutinas, J. Juodkazyte, B. C. Cowie, P. R. Stoddart, M. Zamengo, J. Morikawa and S. Juodkazis, *Nanoscale*, 2015, **7**, 18299-18304.
